# Supplementary material for: Unknown makes unloved—A case study on improving integrated health and social care in the Netherlands using a participatory approach
Source: PubMed Central journal article supplement (PMC7028071; doi:10.1111/hsc.12901), 2019-11-27
Supplement: HSC-28-670-s001.pdf [file HSC-28-670-s001.pdf]

**Appendix 1 – Raw data on team Climate Inventory**

**Table A1. Team Climate Inventory individual and overall mean scores**

|                            | Baseline (mean scores, range 1-5) |        |                      |                  |                        | Follow-up (mean scores, range 1-5) |        |                      |                  |                        |
|----------------------------|-----------------------------------|--------|----------------------|------------------|------------------------|------------------------------------|--------|----------------------|------------------|------------------------|
|                            | Total TCI                         | Vision | Participative safety | Task orientation | Support for innovation | Total TCI                          | Vision | Participative safety | Task orientation | Support for innovation |
| <b>Professionals</b>       |                                   |        |                      |                  |                        |                                    |        |                      |                  |                        |
| NLP001                     | 3.79                              | 3.75   | 3.75                 | 4.0              | 3.67                   | 4.21                               | 4.25   | 4.25                 | 4.0              | 4.33                   |
| NLP002                     | 3.69                              | 4.0    | 3.75                 | 3.0              | 3.67                   | 3.86                               | 4.0    | 4.0                  | 3.33             | 4.0                    |
| NLP003                     | 4.86                              | 4.75   | 5.0                  | 5.0              | 4.67                   | n.i.                               | n.i.   | n.i.                 | n.i.             | n.i.                   |
| NLP004                     | 3.0                               | 3.75   | 2.25                 | 2.67             | 3.33                   | n.i.                               | n.i.   | n.i.                 | n.i.             | n.i.                   |
| NLP005                     | 1.79                              | 1.50   | 2.50                 | 1.0              | 2.0                    | 3.14                               | 3.75   | 2.75                 | 3.0              | 3.0                    |
| NLP006                     | 2.93                              | 3.25   | 3.0                  | 3.0              | 2.33                   | 3.86                               | 3.75   | 4.25                 | 3.67             | 3.67                   |
| NLP007                     | n.c.                              | n.c.   | n.c.                 | n.c.             | n.c.                   | 3.29                               | 2.75   | 4.0                  | 3.33             | 3.0                    |
| NLP008                     | n.i.                              | n.i.   | n.i.                 | n.i.             | n.i.                   | 2.07                               | 2.25   | 1.5                  | 2.67             | 2.0                    |
| Total score                | 3.3                               | 3.8    | 3.4                  | 3.0              | 3.5                    | 3.6                                | 3.8    | 4.0                  | 3.3              | 3.3                    |
| <b>Steering group</b>      |                                   |        |                      |                  |                        |                                    |        |                      |                  |                        |
| NLM001                     | 3.93                              | 4.5    | 4.0                  | 3.33             | 3.67                   | 3.93                               | 4.5    | 4.25                 | 3.33             | 3.33                   |
| NLM002                     | 2.71                              | 3.25   | 2.5                  | 1.67             | 3.33                   | 4.0                                | 4.0    | .                    | .                | .                      |
| NLM003                     | 2.79                              | 3.0    | 2.75                 | 2.33             | 3.0                    | 3.5                                | 3.75   | 3.75                 | 3.0              | 3.33                   |
| NLM004                     | 3.07                              | 4.5    | 1.75                 | 3.0              | 3.0                    | n.c.                               | n.c.   | n.c.                 | n.c.             | n.c.                   |
| NLM005                     | n.i.                              | n.i.   | n.i.                 | n.i.             | n.i.                   | 3.79                               | 3.75   | 4.25                 | 3.33             | 3.67                   |
| Total score                | 2.9                               | 3.9    | 3.6                  | 2.7              | 3.2                    | 3.9                                | 3.9    | 4.3                  | 3.3              | 3.3                    |
| <b>Overall total score</b> | 3.0                               | 3.8    | 2.9                  | 3.0              | 3.3                    | 3.8                                | 3.8    | 4.0                  | 3.3              | 3.3                    |

Note: this table presents individual scores on team climate, collected among steering group members and professionals at the start and end of implementation of the improvement project.

Abbreviations: TCI, Team Climate Inventory; n.c., not completed - this participant did not complete the questionnaire at the time; n.i., not involved - this participant was not involved in the project at the time.
